# Supplementary material for: Controlled self-assembly of block copolymers in printed sub-20 nm cross-bar structures
Source: Royal Society of Chemistry journal article supplement (doi:10.1039/d1na00357g), 2021-01-01
Supplement: d1na00357g1.pdf [file d1na00357g1.pdf]

## Electronic Supplementary Information

### Controlled self-assembly of block copolymers in printed sub-20 nm cross-bar structures

Tae Wan Park,<sup>ab</sup> Young Lim Kang,<sup>c</sup> Myunghwan Byun,<sup>d</sup> Suck Won Hong,<sup>e</sup> Yong-Sik Ahn,<sup>c</sup> Junghoon Lee<sup>f\*</sup> and Woon Ik Park<sup>c\*</sup>

<sup>a</sup>Electronic Convergence Materials Division, Korea Institute of Ceramic Engineering & Technology (KICET) 101 Soho-ro, Jinju 52851, Republic of Korea.

<sup>b</sup>Department of Materials Science and Engineering, Korea University, Seoul 02841, Republic of Korea.

<sup>c</sup>Department of Materials Science and Engineering, Pukyong National University (PKNU), 45 Yongso-ro, Nam-gu, Busan 48513, Republic of Korea.

E-mail: [thane0428@pknu.ac.kr](mailto:thane0428@pknu.ac.kr)

<sup>d</sup>Department of Advanced Materials Engineering, Keimyung University, 1095 Dalgubeol-daero, Daegu 42601, Republic of Korea.

<sup>e</sup>Department of Cogno-Mechatronics Engineering, Department of Optics and Mechatronics Engineering, College of Nanoscience and Nanotechnology, Pusan National University, Busan 46241, Republic of Korea.

<sup>f</sup>Department of Metallurgical Engineering, Pukyong National University (PKNU), 45 Yongso-ro, Nam-gu, Busan 48513, Republic of Korea.

E-mail: [jlee1@pknu.ac.kr](mailto:jlee1@pknu.ac.kr)

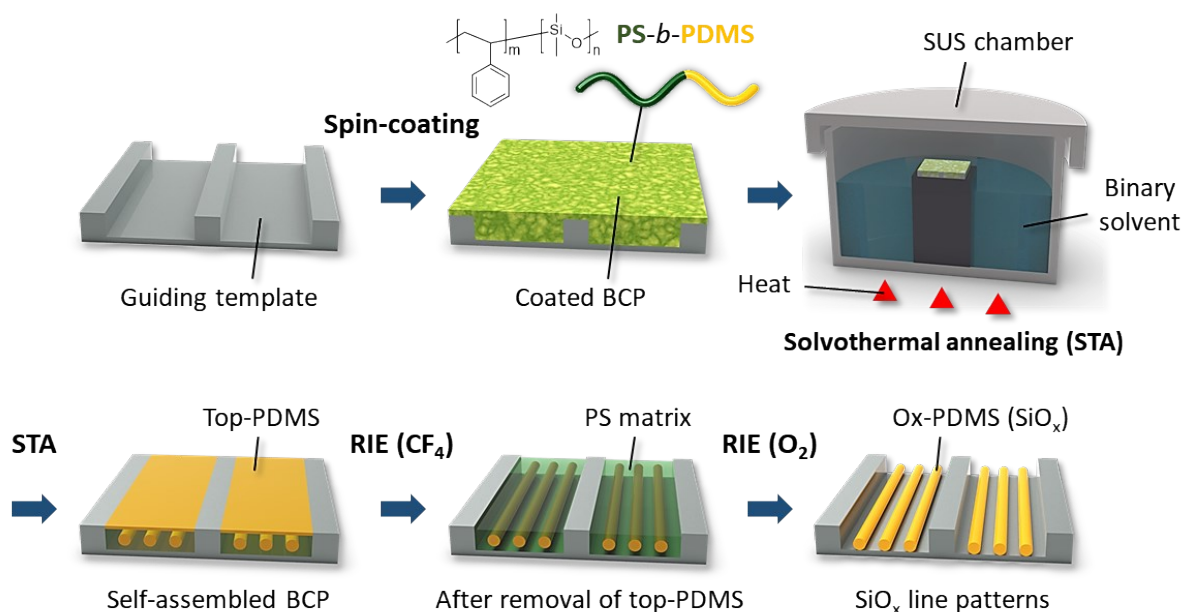

**Fig. S1. Procedure for the pattern formation of sub-20 nm master mold by DSA of BCP.** A cylinder-forming PS-*b*-PDMS BCP (SD45) is spin-coated on the Si guiding template fabricated by photolithography. The spin-coated SD45 thin film is annealed in a toluene at 85°C for 90 min. The highly ordered SiO<sub>x</sub> line structures with a width of 16 nm are successfully formed within the Si guiding template after RIE etching process with CF<sub>4</sub> and O<sub>2</sub> plasma.
